# Supplementary material for: AIM2 deletion enhances blood‐brain barrier integrity in experimental ischemic stroke
Source: PubMed Central journal article supplement (PMC8446221; doi:10.1111/cns.13699), 2021-06-22

Full unedited gel/blot for Figure 1A

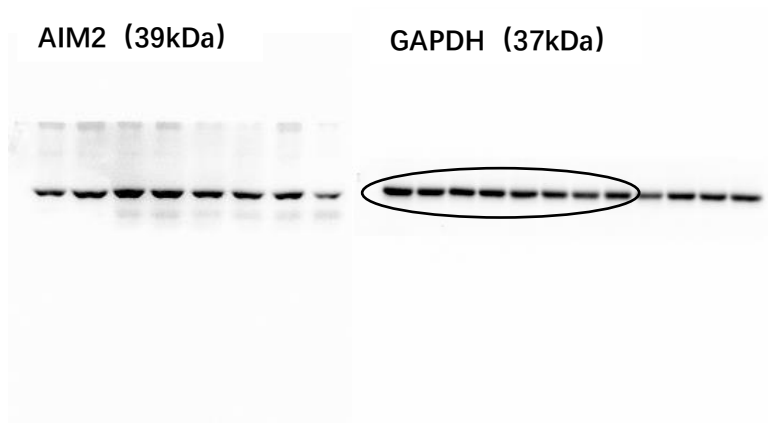

Full unedited gel/blot for Figure 1F

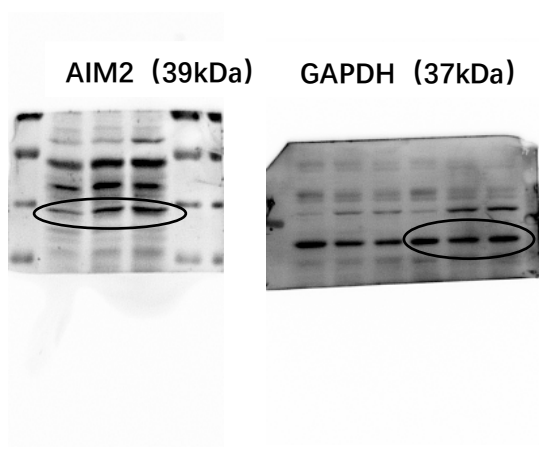

Full unedited gel/blot for Figure 3C

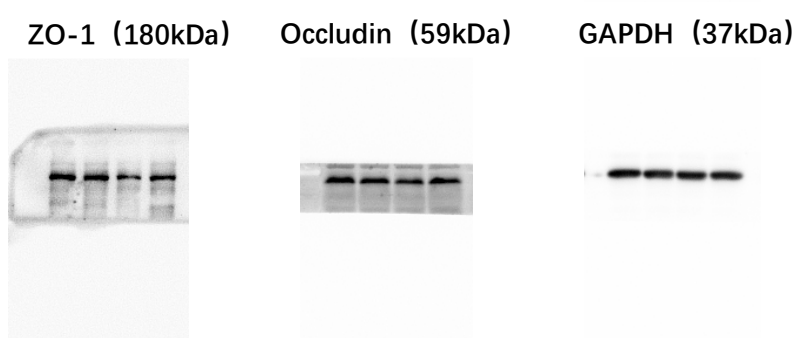

Full unedited gel/blot for Figure 4B

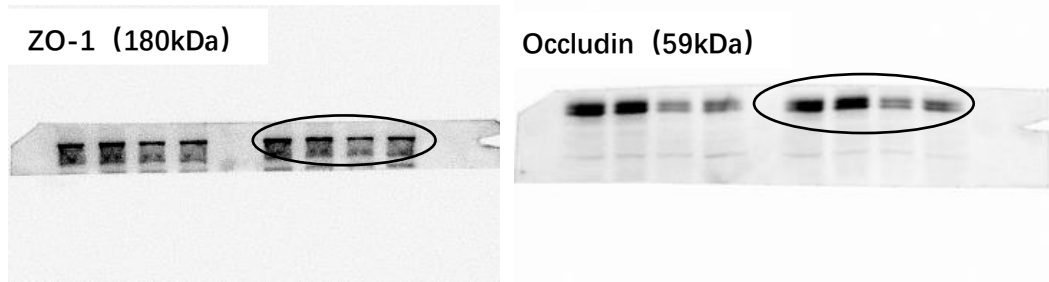

GAPDH (37kDa)

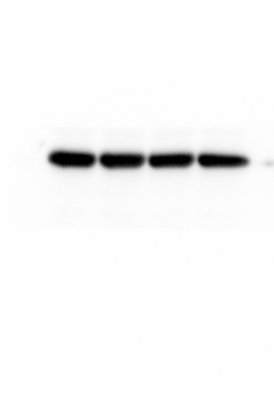

Full unedited gel/blot for Figure 5A

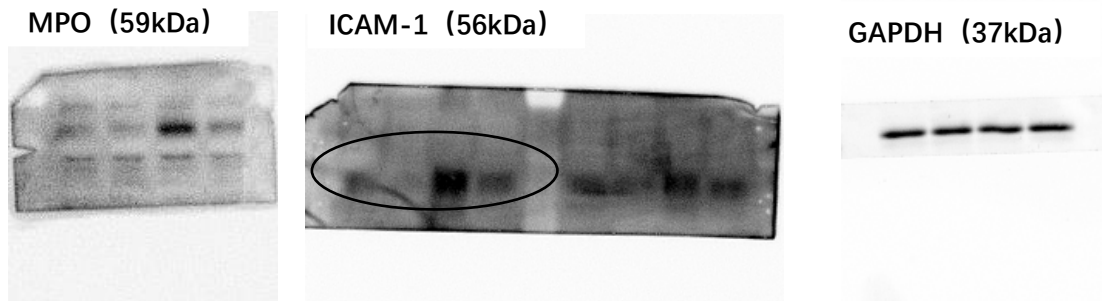

Full unedited gel/blot for Figure 5D

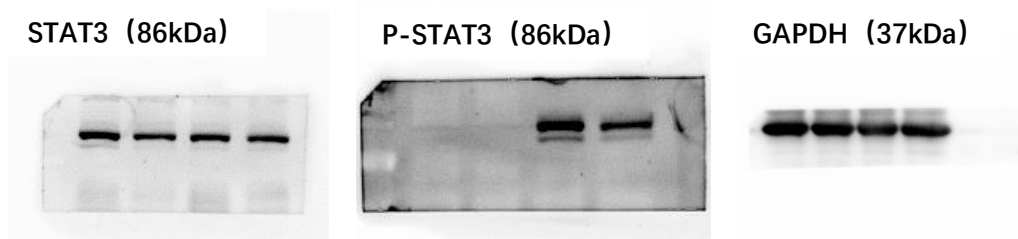

Full unedited gel/blot for Figure 6A

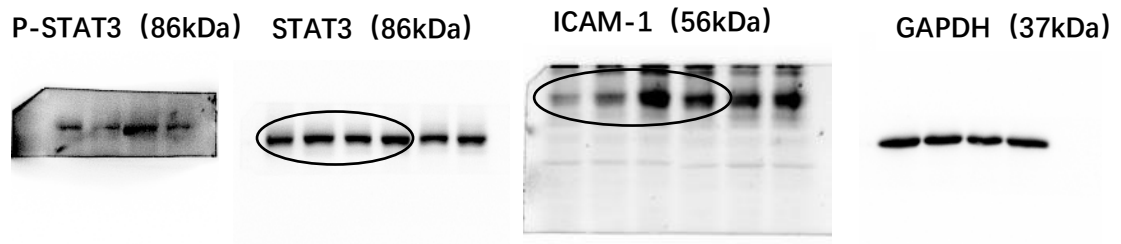

Full unedited gel/blot for Figure 6F

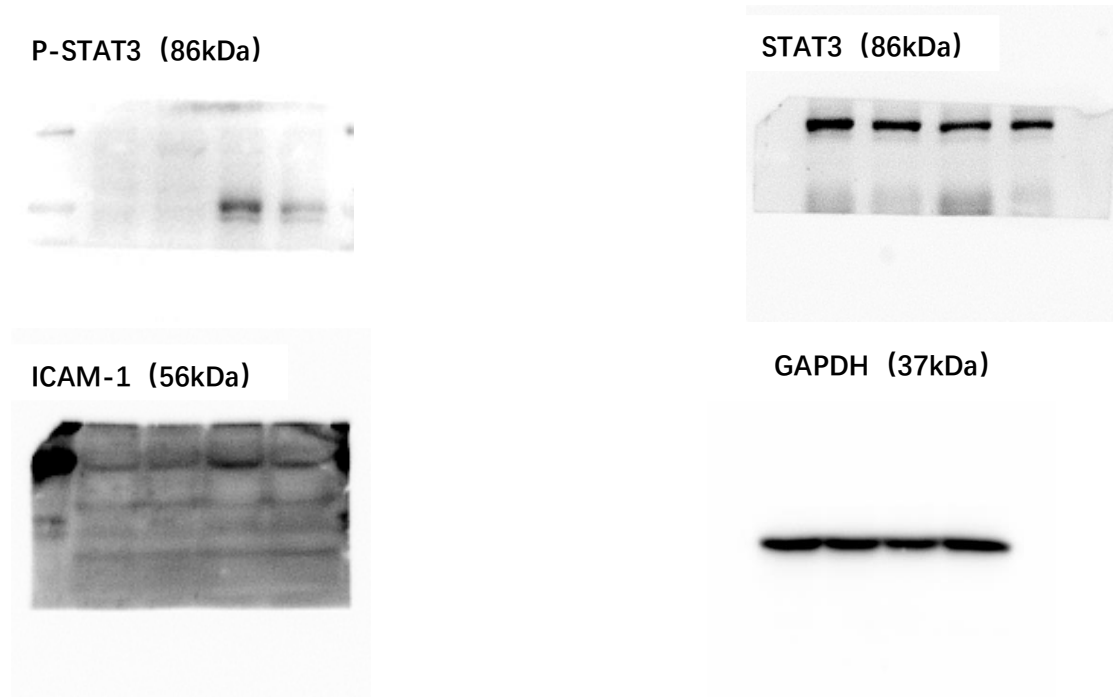

Full unedited gel/blot for Figure 7A

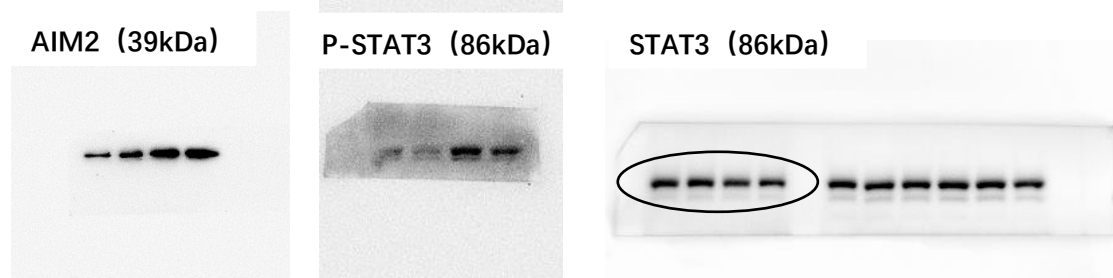

ICAM-1 (56kDa)

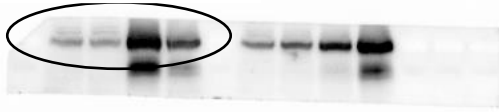

GAPDH (37kDa)

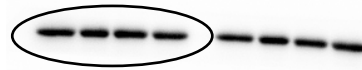

Full unedited gel/blot for Figure S1B

AIM2 (39kDa)

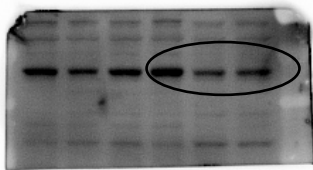

GAPDH (37kDa)

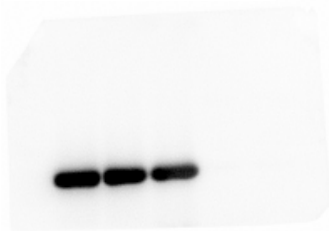

Supplement: CNS-27-1224-s001.pdf [file CNS-27-1224-s001.pdf]
